# Supplementary material for: Integrative analyses identify modulators of response to neoadjuvant aromatase inhibitors in patients with early breast cancer
Source: Springer Nature journal article supplement (doi:10.1186/s13058-015-0532-0), 2015-03-10

**Figure S2**

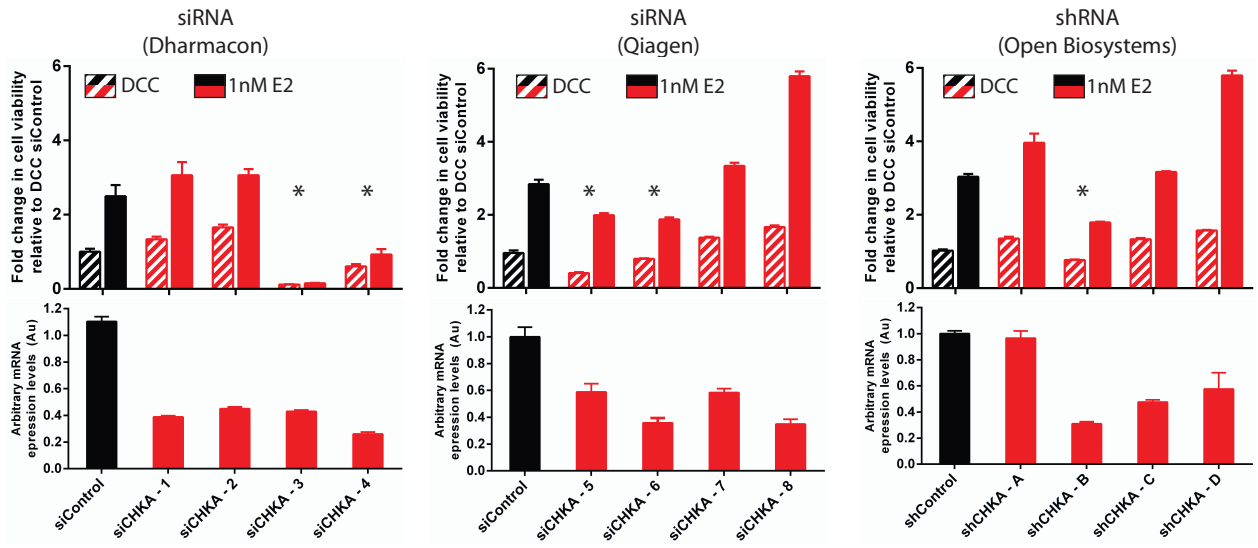

Supplement: MOESM3 [file 9781362]
